# Supplementary material
Source: PubMed Central journal article supplement (PMC3032470)
Supplement: pp.110.166579_1.pdf [file pp.110.166579_1.pdf]

## Supplemental Data

**Supplemental Figure S1.** Schematic view of a plant F-box kelch protein.

**Supplemental Figure S2.** Alignment of F-box associated domains and individual kelch repeats from *A. thaliana* proteins.

**Supplemental Figure S3.** Rooted NJ trees including FBKs and FBAs of *V. vinifera*, *P. trichocarpa*, *O. sativa*, *S. bicolor* and *S. moellendorffii*.

**Supplemental Figure S4.** NJ tree generated using full-length FBK protein sequences of *A. thaliana*, *P. trichocarpa*, *V. vinifera*, *O. sativa*, *S. bicolor*, *S. moellendorffii* and *P. patens*.

**Supplemental Figure S5.** Representative phylogenetic trees.

**Supplemental Figure S6.** Protein sequence alignment of 43 representative FBKs.

**Supplemental Figure S7.** NJ tree of *A. thaliana* and *A. lyrata* FBKs.

**Supplemental Figure S8.** Density plot of the permutation test.

**Supplemental Figure S9.** Relative transcript level of closely related FBKs.

**Supplemental Table S1.** Identifiers of F-box kelch proteins in *A. thaliana*, *P. trichocarpa*, *V. vinifera*, *O. sativa*, *S. bicolor*, *S. moellendorffii* and *P. patens*.

**Supplemental Table S2.** Number of F-box kelch proteins in non-plant model species.

**Supplemental Table S3.** Identifiers of F-box proteins with F-box associated domains in *A. thaliana*, *P. trichocarpa*, *V. vinifera*, *O. sativa*, *S. bicolor*, *S. moellendorffii* and *P. patens*.

**Supplemental Table S4.** Comparison of three tree topologies obtained with NJ, ML and Bayesian Algorithms.

**Supplemental Table S5.** Absolute numbers of unstable, stable, ancient and superstable FBKs in plant genomes.

**Supplemental Table S6.** Sequences of q-RT PCR primers.

**Supplemental Dataset S1.** Tissue-specific expression data of *A. thaliana* FBKs extracted from ATGenExpress\_Plus – extended tissue series.

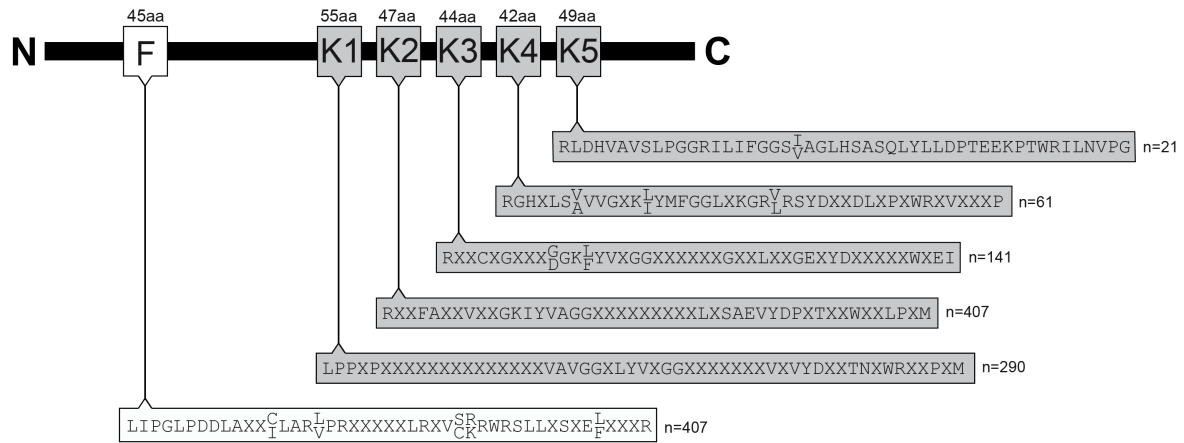

**Supplemental Figure S1.** Schematic view of a plant FBK protein. Consensus sequences of the F-box domain and kelch repeats are depicted below. In general, amino acids that share at least 30% homology between all sequences of an alignment are given in the one letter amino acid code, whereas amino acids with less than 30% homology are depicted as an “X”. Exceptionally, in the case of the kelch 5 repeat amino acids with less than 50% homology are depicted as an “X”. Gaps occurring in the alignment were deleted if more than 50% of the aligned sequences contained a gap at the same position. The positions of each domain within the alignment were determined using Pfam (Sonnhammer et al., 1997). n = number of sequences that underly the respective consensus sequence.

|               |                                                                                     |                                                                                    |
|---------------|-------------------------------------------------------------------------------------|------------------------------------------------------------------------------------|
| kelch repeats | AT1G61540 (K3)                                                                      | -----HDIGYRCFVSLG-----LDG-KIYMFGESEFVYVNFEE-----DRWKICIGDYNLYH-----AV-----         |
|               | AT2G18910 (K3)                                                                      | -----HPRSWHSSCTLD-----GT-KLIVSGCCADSGAL-----LSDTFLLDLSMDIFA-----WRETFVPPW          |
|               | AT3G08810 (K2)                                                                      | -----LSSISASVR-----DG---NQGGHGYSDSR-----KNSFVFAYNSKEGR-----WDHLVGL-                |
|               | AT5G39560 (K2)                                                                      | -----RSDPVAVLID-----QR-IYVLGGREMDDESDDWF-----EVFD-IKTQWRALPS-----F                 |
|               | AT2G29770 (K1)                                                                      | IKSLPPLNHGSAVVTIG-----YH-MYVLGGHNQPTSN-----VSIID-LRFHTSCSLPR-----M-----            |
|               | AT4G39240 (K1)                                                                      | --LVPP-SFPSIFCWG-----MSIVAIDSE-IYVLGGCIELVSTG-----FVVECPSHTCRLLPS-----M-----       |
|               | AT1G51550 (K5)                                                                      | -----RVGHSATLVL-----GGR-ILYVGGEDSYRHRKDD-----FWVLDVKTIPSSGLKPGGLSLNGSSVWKKLDRIS    |
|               | AT2G18910 (K5)                                                                      | -----RLDHVAISLP-----GGR-ILYVGGSVAGLDS-----ASQLYLLDPNEEKPA-----WRILNVQG             |
|               | AT1G27420 (K4)                                                                      | -YSYTVVR-NKVY-FMD-----RNMPGR-LGV-----FD-----PEE-NS-----WSSVFPVP                    |
|               | AT5G57360 (K4)                                                                      | -----SRLGHTLSVYG-----GRKILMFGGLAKSGPLKFR-----SSDVFTMDLSEEEPC-----WRCVTGSG          |
|               | AT1G32430                                                                           | --SYFIDDKRLVICSCD-----ETGRAWIYVVGNNKLVSKTQLD-----SVVDPWPLHCTVFPSP-----LVLVLP       |
|               | AT1G62270                                                                           | --SFLVDEENKVIVC-----CDEE-EDDINDTVYVIGENEFWRKE-----DIVQRSYRPRMFSYVPS-----LVQI       |
|               | AT2G27520                                                                           | --RIFIEEDKVVIVV-----DCDDRWKENMIYIVGKNGFKKLSYEK-----DRSNLWRLPFFFSYVPS-----LVGLY     |
|               | AT3G16880                                                                           | --IFFIDEKKVIVVFD-----KDKEMRNRITAYIVIGENGFYFRKVD-----LGD-SESEF-PVRC SYVPS-----SVETK |
|               | AT3G17280                                                                           | --SFLLEDEKKVAVCSDAV-CSDTDEDEDRIYIVGEGVDFVYDEV-----STETSHNWPFLVSYVPS-----LVHIE      |
| AT3G17530     | --SFLLEENKVAVC-----SDVDTKDGLRSRIYIVGKDFYKEVFKD-----TRGSDNNWPLLQYVPS-----LVSTIQ      |                                                                                    |
| AT3G17540     | --SFLLEENKVAVC-----CDRHIDDEKTRIVYVGVDFYKEVYKER-----TKGAHFNWPLLISYVPS-----LVHIIQ     |                                                                                    |
| AT3G20710     | --NFFIDEKKVAVVFEKDSWSWYMNPNYNKAVIACENGFYFKSVNLL-----KSPNTLQLG-HLVCS-----Y           |                                                                                    |
| AT4G05080     | --NFFIDEKKVAVVIDKVESEDCKRSNSHIN-SYIIGDDGYLKKMNSLG-----NTARSYTAIMLSSCYVSS-----LVQID  |                                                                                    |
| AT4G33290     | --GFFIDEKKK-VALG-----FDEEF-GRKTFNIIIGEDGYFREFDRITFNIEEAGERAGVNCGSYVCSYVPS-----LVRIK |                                                                                    |
|               | 1.....10.....20.....30.....40.....50.....60.....70.....80.....90..                  |                                                                                    |

**Supplemental Figure S2.** Alignment of F-box associated domains and individual kelch repeats (K1-K5) from randomly chosen *A. thaliana* proteins obtained with ClustalX.

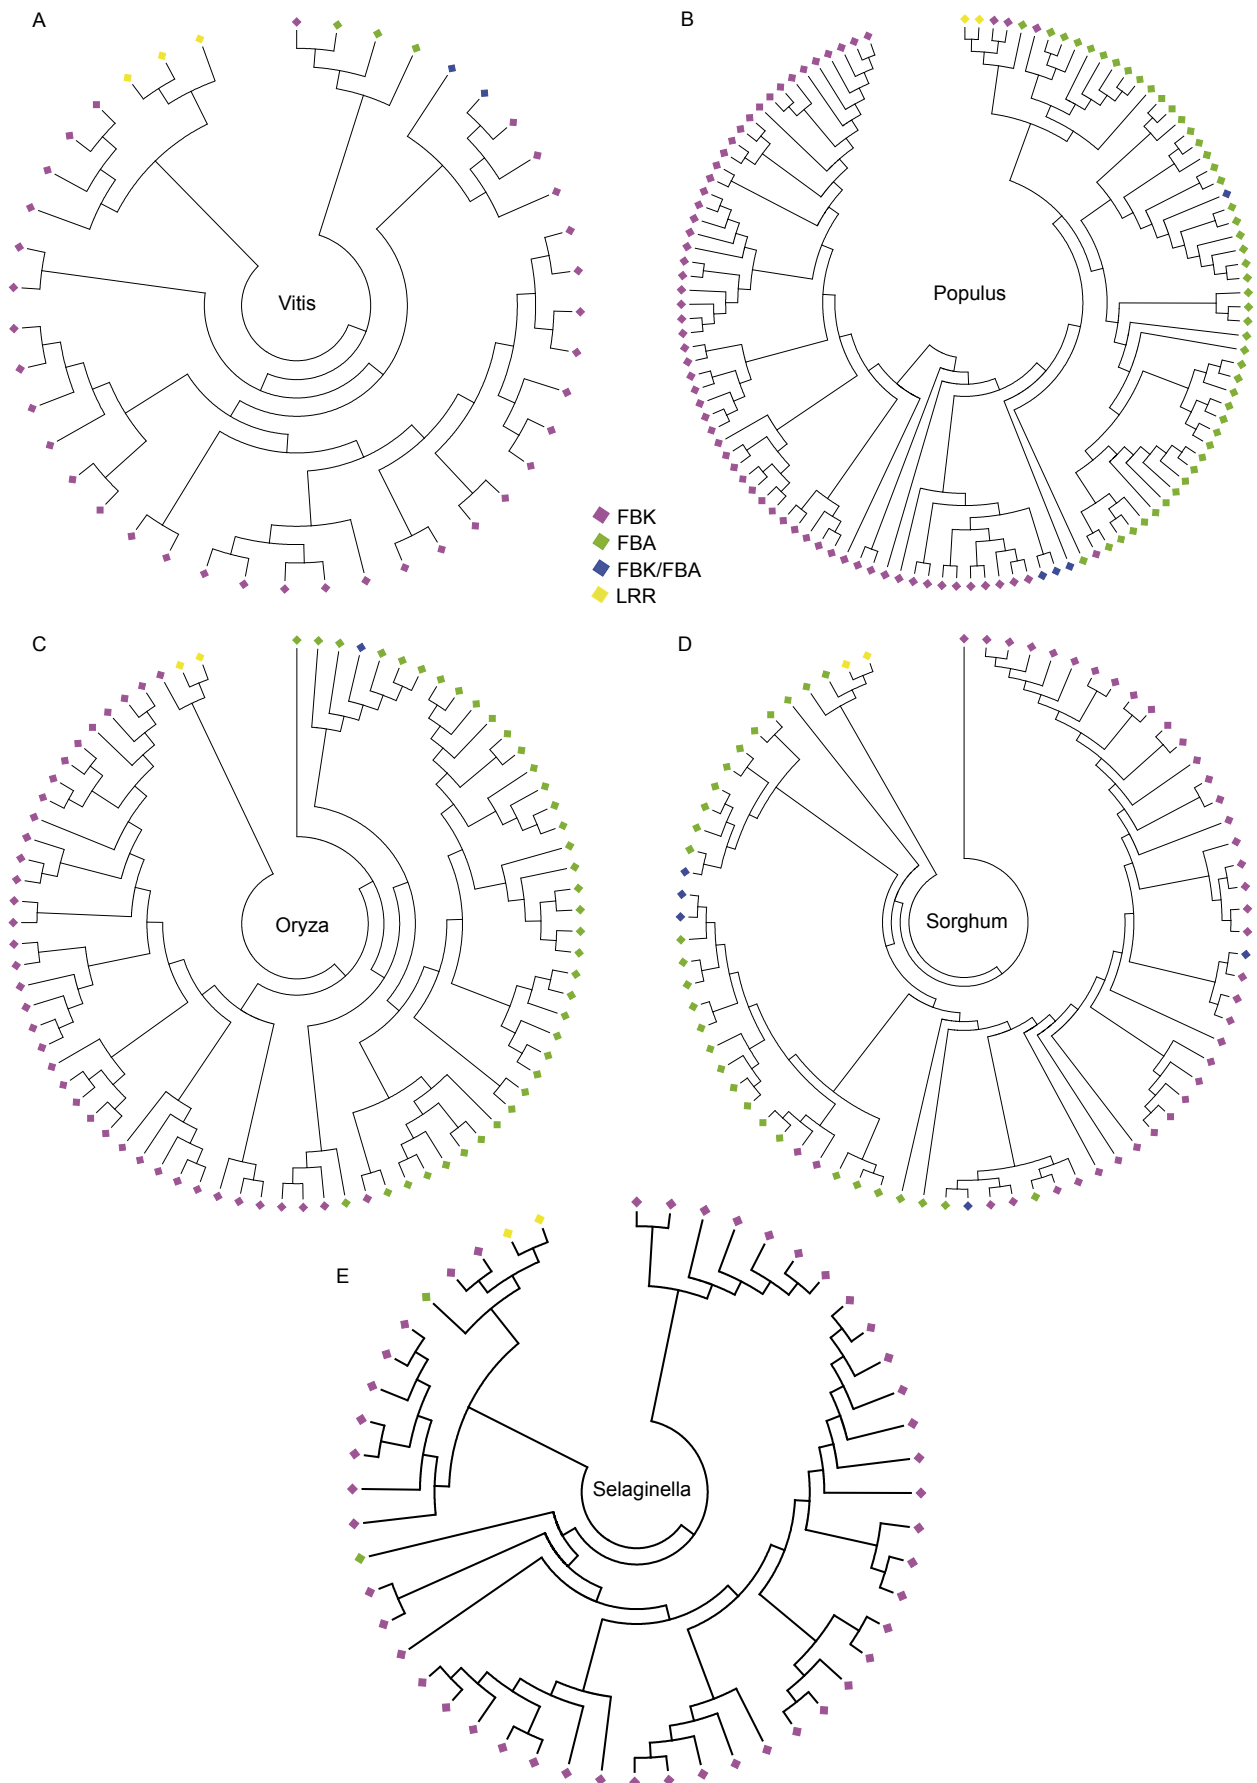

**Supplemental Figure S3.** FBKs and FBAs are closely related to each other. Rooted NJ trees including FBKs and FBAs of **A:** *V. vinifera*, **B:** *P. trichocarpa*, **C:** *O. sativa*, **D:** *S. bicolor* and **E:** *S. moellendorffii*. Alignment of full-length protein sequences and construction of the NJ trees was performed in MEGA, using a bootstrap value of 1000. Trees were rooted with leucine-rich repeat containing F-box proteins (LRRs) of the respective species identified by BlastP search with AtTIR1. FBK/FBA proteins are characterized by overlapping positions of the F-box associated domain and individual kelch repeats.

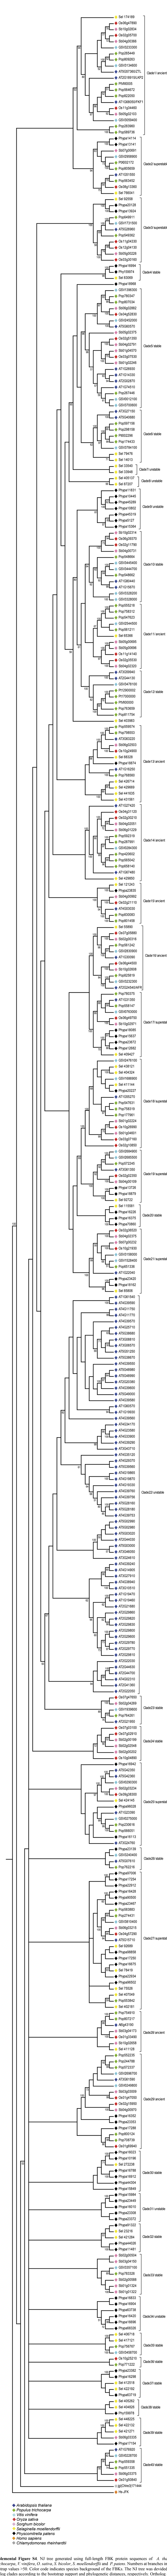

**Supplemental Figure S4.** NJ tree generated using full-length FBK protein sequences of *A. thaliana*, *P. trichocarpa*, *V. vinifera*, *O. sativa*, *S. bicolor*, *S. moellendorffii* and *P. patens*. Numbers at branches indicate bootstrap values >50. Color code indicates species background of the FBKs. The NJ tree was divided in 40 ortholog clades according to the bootstrap support and phylogenetic distances, respectively. Ortholog clades were categorized in: (i) unstable: lineage-specific clades, (ii) stable: clades including orthologs in at least two species, (iii) ancient: clades including orthologs in at least one lower land plant, one monocot and one eudicot species, (iv) superstable: clades with orthologs in all analyzed land plant species.

A Maximum Likelihood

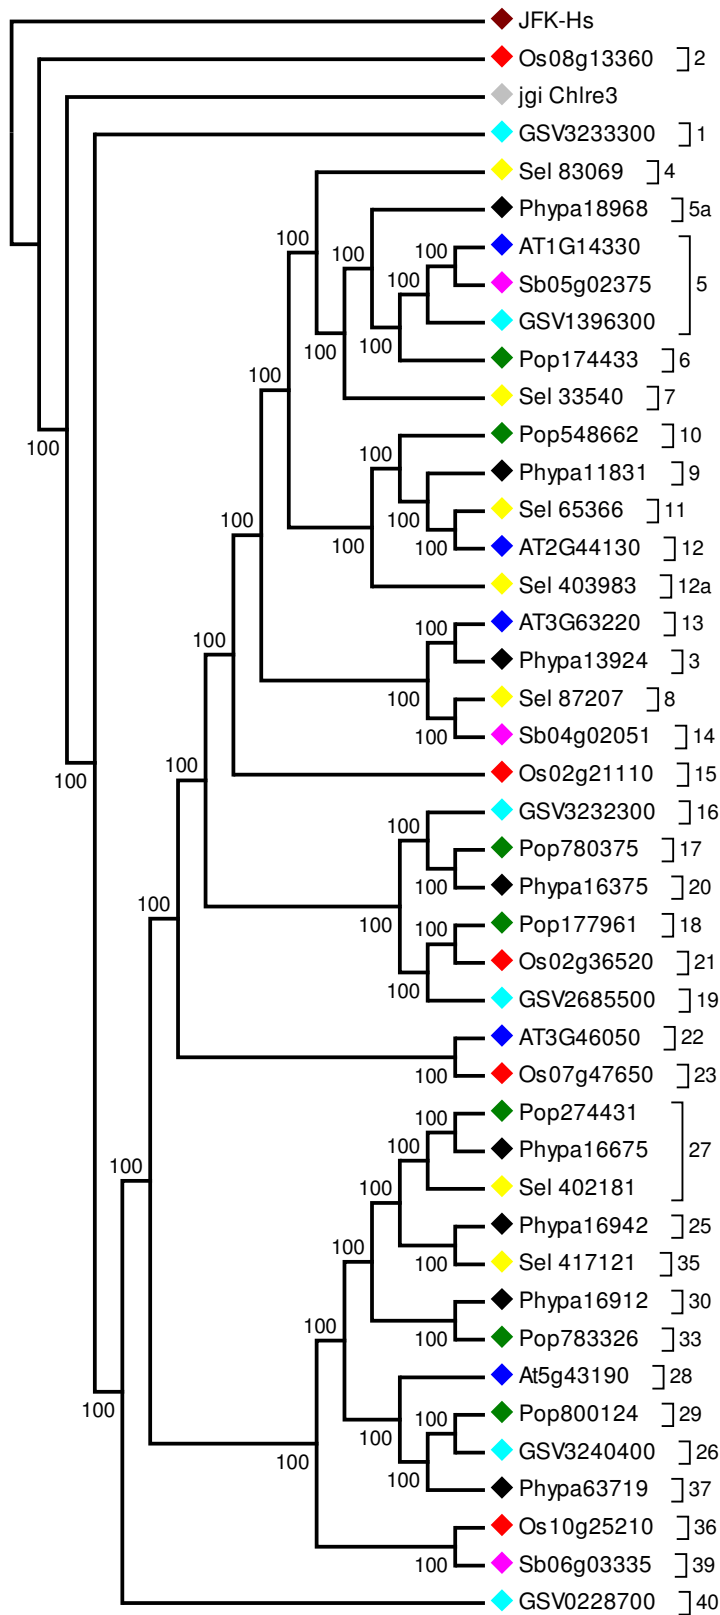

B Bayesian

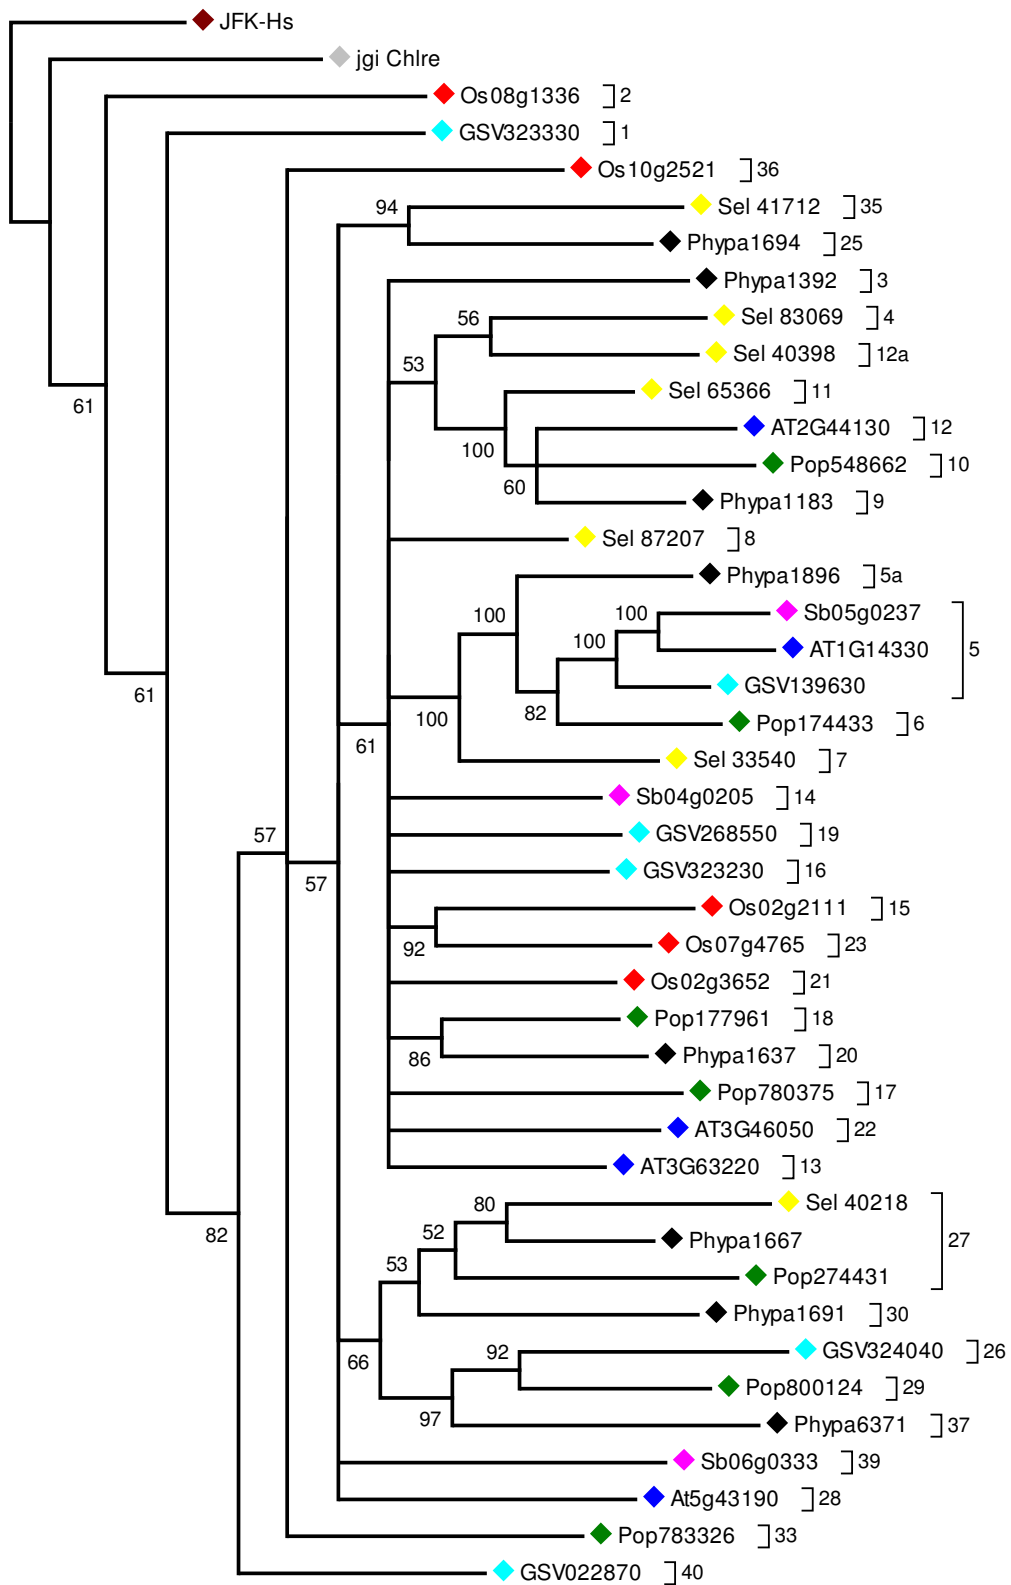

C Neighbor-joining

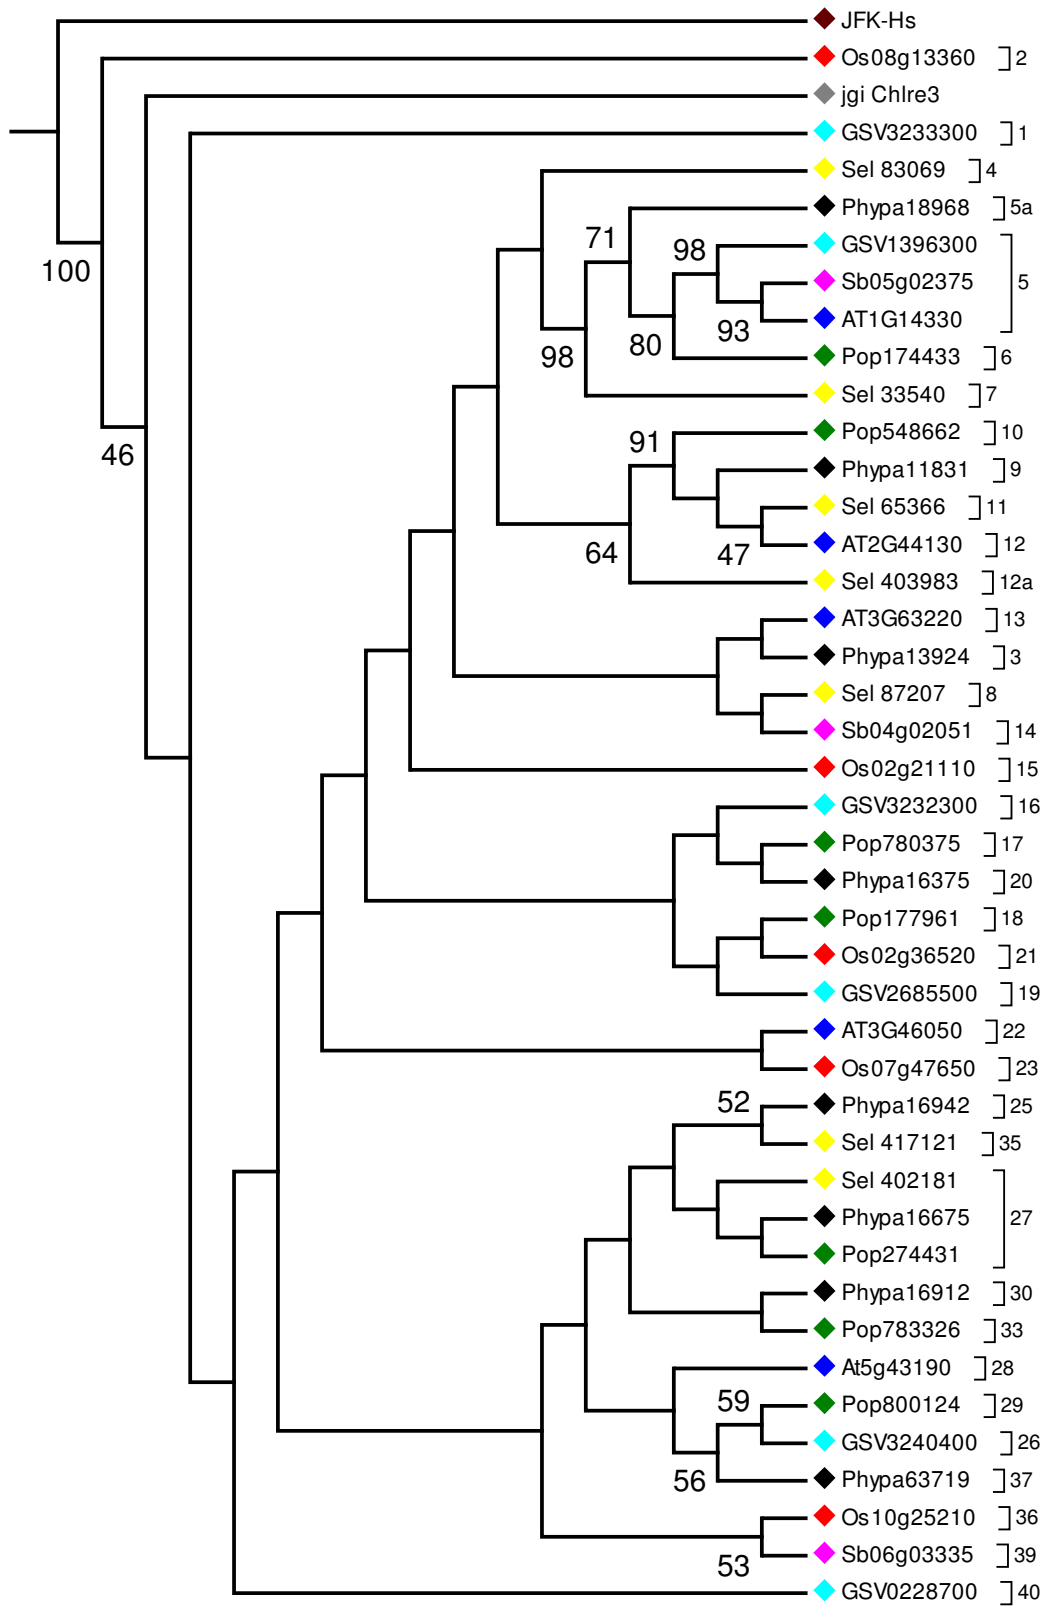



**Supplemental Figure S5.** Representative phylogenetic trees. **A:** Maximum likelihood (ML), **B:** Bayesian and **C:** Neighbor-Joining (NJ) trees from 43 representative FBK protein sequences. At least one sequence from each of the clades of the NJ tree from Supplementary Figure 4 was randomly sampled. The number of the clade from which the sequence was sampled is displayed after the bracket. Single sequences not belonging to a group of orthologs are labeled as clade #a. The Bayesian and NJ trees display numbers at the nodes that have bootstrap values >45%; the ML tree displays nodes with bootstrap values of 100%. Sequence names are abbreviated as in Supplemental Fig. S6.

F-Box

Kelch-1

Multiple sequence alignment for F-Box domain proteins. Header: jgi\_Ch1re3, Sel\_417121, Sel\_65366, Sel\_87207, Sel\_33540, Sel\_402181, Sel\_403983, Sel\_83069, Sb04g02051, Sb05g02375, Sb06g03335, GSV1396300, GSV2685500, GSV3232300, GSV3233300, GSV3240400, GSV0228700, Os02g21110, Os02g36520, Os07g47650, Os08g13360, Os10g25210, Pop174433, Pop177961, Pop274431, Pop548662, Pop780375, Pop800124, Pop783326, At1g14330, At2g44130, At3g46050, At3g63220, At5g43190, Phyta11831, Phyta13924, Phyta16375, Phyta16675, Phyta16942, Phyta18968, Phyta16912, Phyta63719, JFK-Hs. The alignment shows conserved residues across species, with gaps indicated by dashes.

Kelch-1

Kelch-2

Multiple sequence alignment for Kelch-1 and Kelch-2 domain proteins. Header: jgi\_Ch1re3, Sel\_417121, Sel\_65366, Sel\_87207, Sel\_33540, Sel\_402181, Sel\_403983, Sel\_83069, Sb04g02051, Sb05g02375, Sb06g03335, GSV1396300, GSV2685500, GSV3232300, GSV3233300, GSV3240400, GSV0228700, Os02g21110, Os02g36520, Os07g47650, Os08g13360, Os10g25210, Pop174433, Pop177961, Pop274431, Pop548662, Pop780375, Pop800124, Pop783326, At1g14330, At2g44130, At3g46050, At3g63220, At5g43190, Phyta11831, Phyta13924, Phyta16375, Phyta16675, Phyta16942, Phyta18968, Phyta16912, Phyta63719, JFK-Hs. The alignment shows conserved residues across species, with gaps indicated by dashes.

Kelch-3

Kelch-4

Multiple sequence alignment for Kelch-3 and Kelch-4. The alignment shows conserved regions across various species, with gaps indicated by dashes. The sequence starts with 'jgi\_Ch1r3' and ends with 'JFK-Hs'. The alignment is approximately 300 amino acids long.

Kelch-4

Kelch-5

Multiple sequence alignment for Kelch-4 and Kelch-5. The alignment shows conserved regions across various species, with gaps indicated by dashes. The sequence starts with 'jgi\_Ch1r3' and ends with 'JFK-Hs'. The alignment is approximately 300 amino acids long.

**Supplemental Figure S6.** Protein sequence alignment created with hmalign of 43 representatives of the FBKs, where at least one sequence was sampled from each of the clades of the gene tree in Supplemental Fig. S4. Positions of F-box domain and kelch repeats are indicated with black bars on top of the alignment, except for kelch repeat 4 and 5, which are enclosed in a box inside the alignment. Sequence names are abbreviated for visualization purposes. Abbreviations are: Chlre= *Chlamydomonas reinhardtii* jgi#; Phypa= *Physcomitrella patens*#=jgi number; Selmo= *Selaginella moellendorffii*#=jgi number; Os# = *Oryza sativa* LOC\_OS#, where # stands for locus number given at MSU (TIGR); Sb#= *Sorghum bicolor* (jgi); Pop\_#= *Populus trichocarpa*#=jgi number; GSV # = Genoscope number first 7 digits; ATI code (TAIR) is used for *Arabidopsis thaliana*; JFK-Hs = *Homo sapiens* FBX42 (AAH43410.1).

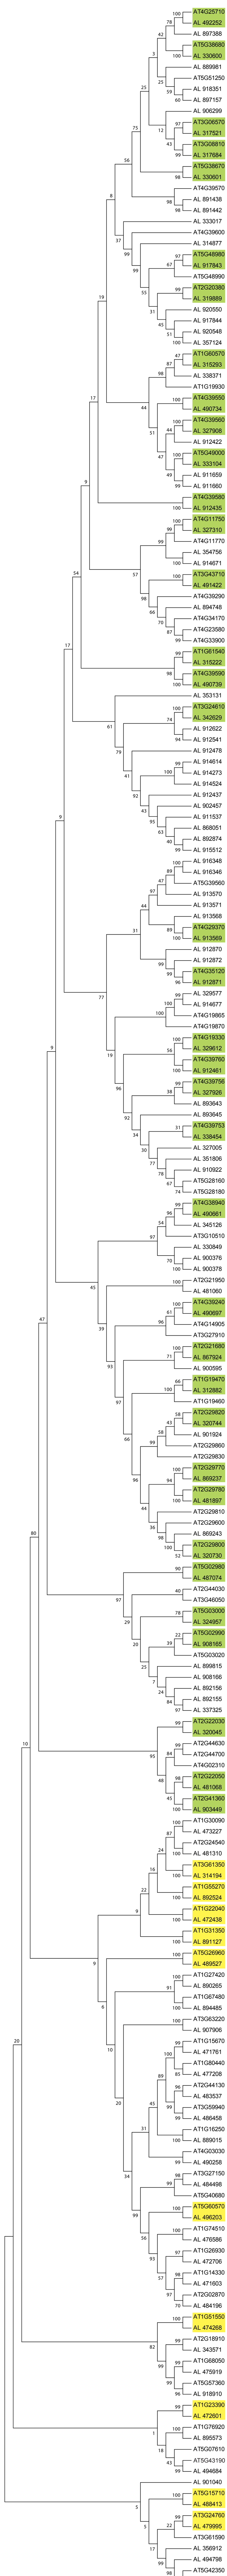

**Supplemental Figure S7.** NJ tree generated using partial FBK protein sequences (joined F-box and kelch domain) of *A. thaliana* and *A. lyrata*. Numbers at branches indicate bootstrap values (1000 replicates). AL numbers represent *A. lyrata* protein IDs according to Joint Genome Institute (genome.jgi-psf.org/Arly1). Boxed sequences designate proteins used for Ka/Ks ratios in Figure 5: yellow = superstable, green = unstable.

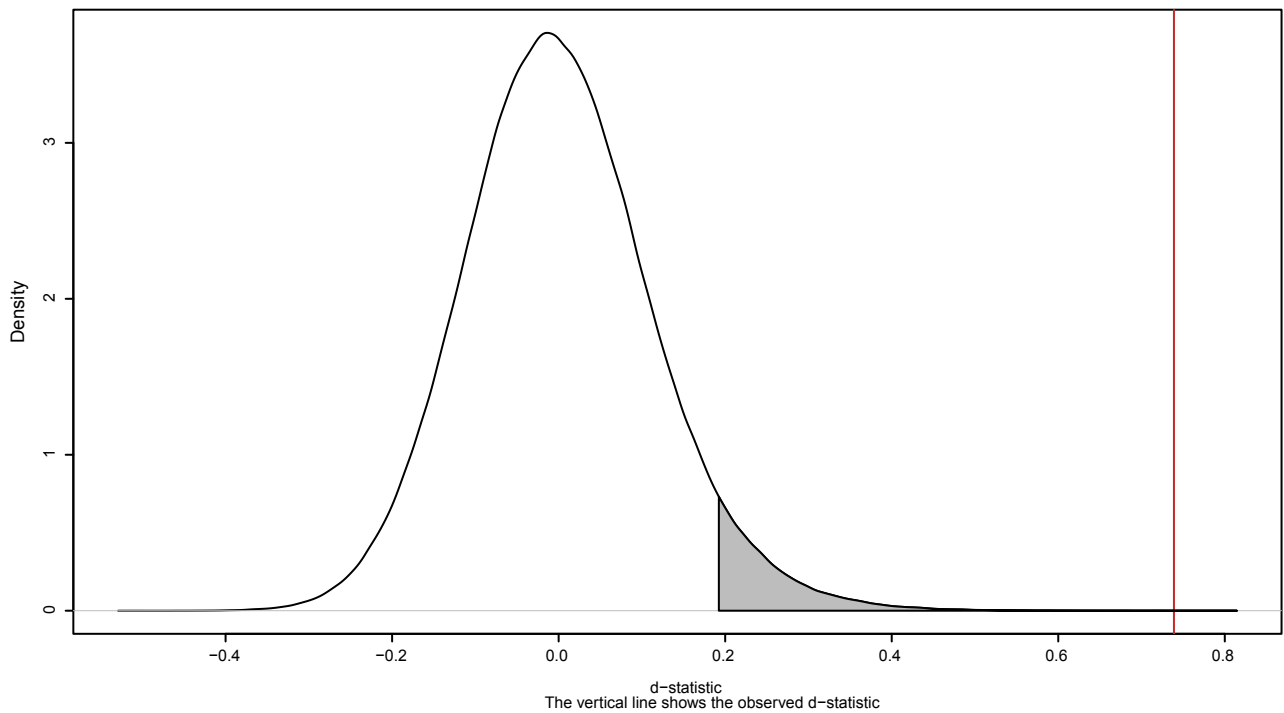

**Supplemental Figure S8.** Density plot of the test statistic  $d$  generated from the permutation test (one million repeats).  $D$ -statistic is defined as difference of the average means between the similarity of all kelch repeats within a protein and the similarity of kelch repeats between different proteins. Genetic distances among different kelch repeats were estimated using protdist from the PHYLIP suite (Felsenstein, 1989). The red line shows the  $d$ -statistic value for the observed arrangement of kelch repeats. The gray shaded area corresponds to the critical region ( $\alpha=0.05$ ), with a critical value of  $d$  as 0.1923.

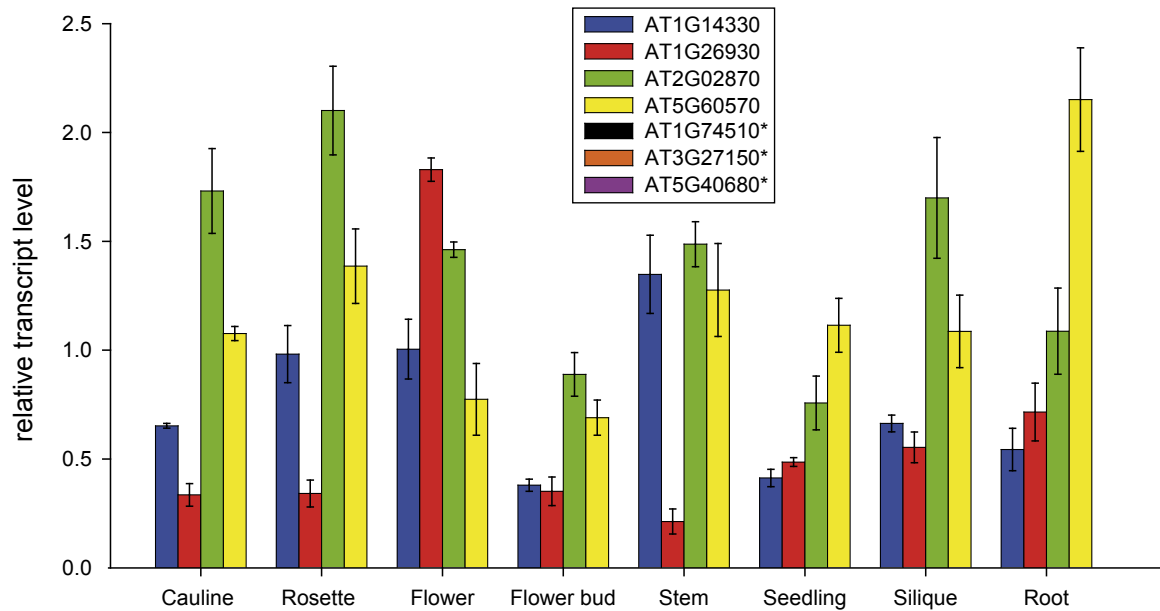

**Supplemental Figure S9.** Relative transcript level of a subset of closely related FBKs. Plant organs were harvested from 6-week-old *A. thaliana* Col-0 plants cultivated under long day conditions at 20°C. Seedlings were cultivated for 7 days on ATS medium under long day conditions at 20°C. Three biological replicates were measured, each in two technical replicates. Error bars represent SE. Transcript level of genes labeled with asterisks were under the detection limit in the analyzed plant organs.

**Supplemental Table S1.** Identifiers of F-box kelch proteins in *A. thaliana*, *P. trichocarpa*, *V. vinifera*, *O. sativa*, *S. bicolor*, *S. moellendorffii* and *P. patens*.

| Arabidopsis | Populus    | Vitis       | Oryza      | Sorghum     | Selaginella | Physcomitrella      |
|-------------|------------|-------------|------------|-------------|-------------|---------------------|
| AT1G14330   | Pop 174433 | GSV00121001 | Os01g33490 | Sb01g013220 | Selm 115581 | jgi Phypa1_1 101961 |
| AT1G15670   | Pop 177961 | GSV02287001 | Os01g47050 | Sb01g013240 | Selm 121243 | jgi Phypa1_1 104453 |
| AT1G16250   | Pop 230616 | GSV02498001 | Os01g50840 | Sb01g022240 | Selm 14013  | jgi Phypa1_1 108027 |
| AT1G19460   | Pop 244788 | GSV02750001 | Os01g69940 | Sb01g022460 | Selm 174189 | jgi Phypa1_1 114815 |
| AT1G19470   | Pop 265449 | GSV02843001 | Os02g02350 | Sb01g045700 | Selm 23216  | jgi Phypa1_1 118316 |
| AT1G19930   | Pop 267446 | GSV02903001 | Os02g05700 | Sb01g046015 | Selm 272238 | jgi Phypa1_1 126823 |
| AT1G22040   | Pop 274431 | GSV07630001 | Os02g10850 | Sb02g001990 | Selm 33540  | jgi Phypa1_1 131411 |
| AT1G23390   | Pop 283960 | GSV13963001 | Os02g11790 | Sb02g002025 | Selm 33948  | jgi Phypa1_1 137266 |
| AT1G26930   | Pop 287991 | GSV15284001 | Os02g15950 | Sb02g003160 | Selm 402181 | jgi Phypa1_1 139248 |
| AT1G27420   | Pop 298158 | GSV16869001 | Os02g21110 | Sb02g005040 | Selm 403983 | jgi Phypa1_1 141114 |
| AT1G30090   | Pop 420602 | GSV17315001 | Os02g30210 | Sb02g005880 | Selm 404324 | jgi Phypa1_1 153643 |
| AT1G31350   | Pop 547623 | GSV19396001 | Os02g35530 | Sb02g025486 | Selm 404826 | jgi Phypa1_1 156376 |
| AT1G51550   | Pop 547631 | GSV24520001 | Os02g36520 | Sb02g032340 | Selm 405137 | jgi Phypa1_1 158495 |
| AT1G55270   | Pop 548662 | GSV24761001 | Os02g51350 | Sb02g042690 | Selm 405262 | jgi Phypa1_1 159848 |
| AT1G60570   | Pop 548664 | GSV25445001 | Os03g07160 | Sb03g030090 | Selm 406718 | jgi Phypa1_1 159974 |
| AT1G61540   | Pop 549362 | GSV26849001 | Os03g07530 | Sb03g041500 | Selm 407049 | jgi Phypa1_1 159978 |
| AT1G67480   | Pop 551335 | GSV26855001 | Os03g30160 | Sb03g041730 | Selm 409427 | jgi Phypa1_1 160103 |
| AT1G68050   | Pop 552235 | GSV26967001 | Os04g31120 | Sb04g001090 | Selm 411128 | jgi Phypa1_1 160232 |
| AT1G74510   | Pop 553842 | GSV28309001 | Os04g52830 | Sb04g003660 | Selm 411144 | jgi Phypa1_1 161137 |
| AT1G76920   | Pop 555218 | GSV29589001 | Os04g57290 | Sb04g007310 | Selm 412518 | jgi Phypa1_1 162266 |
| AT1G80440   | Pop 558147 | GSV30594001 | Os06g39370 | Sb04g009700 | Selm 417121 | jgi Phypa1_1 162989 |
| AT2G02870   | Pop 559358 | GSV31346001 | Os06g44500 | Sb04g009920 | Selm 421271 | jgi Phypa1_1 163528 |
| AT2G18915   | Pop 559574 | GSV31580001 | Os06g47890 | Sb04g020510 | Selm 421284 | jgi Phypa1_1 163752 |
| AT2G20380   | Pop 561211 | GSV32323001 | Os06g49750 | Sb04g023200 | Selm 422132 | jgi Phypa1_1 164205 |
| AT2G21680   | Pop 561242 | GSV32333001 | Os07g02910 | Sb04g023750 | Selm 422192 | jgi Phypa1_1 164284 |
| AT2G21950   | Pop 563452 | GSV32404001 | Os07g03100 | Sb04g027910 | Selm 424145 | jgi Phypa1_1 166753 |
| AT2G22030   | Pop 564672 | GSV33280001 | Os07g05880 | Sb05g002260 | Selm 426714 | jgi Phypa1_1 166966 |
| AT2G22050   | Pop 565042 | GSV33282001 | Os07g47650 | Sb05g006950 | Selm 429669 | jgi Phypa1_1 167883 |
| AT2G24540   | Pop 566051 | GSV33571001 | Os08g13360 | Sb05g006960 | Selm 429850 | jgi Phypa1_1 168336 |
| AT2G29600   | Pop 572245 | GSV34447001 | Os09g38300 | Sb05g021030 | Selm 431561 | jgi Phypa1_1 169046 |



| Arabidopsis | Populus    | Vitis       | Oryza      | Sorghum     | Selaginella | Physcomitrella      |
|-------------|------------|-------------|------------|-------------|-------------|---------------------|
| AT2G29770   | Pop 572337 | GSV34454001 | Os10g04890 | Sb05g023750 | Selm 438121 | jgi Phypa1_1 169120 |
| AT2G29780   | Pop 583883 | GSV34587001 | Os10g21930 | Sb06g012290 | Selm 441635 | jgi Phypa1_1 169426 |
| AT2G29800   | Pop 589736 | GSV34781001 | Os10g24900 | Sb06g025030 | Selm 448225 | jgi Phypa1_1 169940 |
| AT2G29810   | Pop 592319 | GSV37006001 | Os10g25210 | Sb06g028820 | Selm 55890  | jgi Phypa1_1 171546 |
| AT2G29820   | Pop 597156 | GSV37841001 | Os10g26990 | Sb06g032150 | Selm 65366  | jgi Phypa1_1 172502 |
| AT2G29830   | Pop 649911 | GSV38104001 | Os11g04330 | Sb06g033350 | Selm 75526  | jgi Phypa1_1 172546 |
| AT2G29860   | Pop 651336 |             | Os11g14140 | Sb06g033750 | Selm 766041 | jgi Phypa1_1 172882 |
| AT2G41360   | Pop 658140 |             | Os11g34460 | Sb07g002320 | Selm 78419  | jgi Phypa1_1 180856 |
| AT2G44030   | Pop 708739 |             | Os12g04130 | Sb07g006910 | Selm 79476  | jgi Phypa1_1 181624 |
| AT2G44130   | Pop 754910 |             |            | Sb10g023140 | Selm 83069  | jgi Phypa1_1 188742 |
| AT2G44630   | Pop 756767 |             |            | Sb10g026080 | Selm 85806  | jgi Phypa1_1 188796 |
| AT2G44700   | Pop 758312 |             |            | Sb10g026580 | Selm 87207  | jgi Phypa1_1 189687 |
| AT3G06570   | Pop 758319 |             |            | Sb10g028340 | Selm 88328  | jgi Phypa1_1 201289 |
| AT3G08810   | Pop 762216 |             |            | Sb10g029710 | Selm 92558  | jgi Phypa1_1 202273 |
| AT3G10510   | Pop 763659 |             |            |             | Selm 92689  | jgi Phypa1_1 229126 |
| AT3G24610   | Pop 764261 |             |            |             | Selm 92722  | jgi Phypa1_1 229344 |
| AT3G24760   | Pop 768560 |             |            |             |             | jgi Phypa1_1 231395 |
| AT3G27150   | Pop 771222 |             |            |             |             | jgi Phypa1_1 233086 |
| AT3G27910   | Pop 780347 |             |            |             |             | jgi Phypa1_1 233535 |
| AT3G43710   | Pop 780375 |             |            |             |             | jgi Phypa1_1 233728 |
| AT3G46050   | Pop 783326 |             |            |             |             | jgi Phypa1_1 233823 |
| AT3G59940   | Pop 798553 |             |            |             |             | jgi Phypa1_1 234202 |
| AT3G61350   | Pop 800124 |             |            |             |             | jgi Phypa1_1 234490 |
| AT3G61590   | Pop 801458 |             |            |             |             | jgi Phypa1_1 234671 |
| AT3G63220   | Pop 805659 |             |            |             |             | jgi Phypa1_1 23672  |
| AT4G02310   | Pop 807034 |             |            |             |             | jgi Phypa1_1 23835  |
| AT4G03030   | Pop 807217 |             |            |             |             | jgi Phypa1_1 44026  |
| AT4G11750   | Pop 809263 |             |            |             |             | jgi Phypa1_1 44304  |
| AT4G11770   | Pop 811754 |             |            |             |             | jgi Phypa1_1 45289  |
| AT4G14905   | Pop 822050 |             |            |             |             | jgi Phypa1_1 45319  |
| AT4G19330   | Pop 825819 |             |            |             |             | jgi Phypa1_1 5127   |
| AT4G19865   | Pop 830083 |             |            |             |             | jgi Phypa1_1 63719  |

---

| Arabidopsis | Populus      | Vitis | Oryza | Sorghum | Selaginella | Physcomitrella     |
|-------------|--------------|-------|-------|---------|-------------|--------------------|
| AT4G19870   | PtI002296    |       |       |         |             | jgi Phypa1_1 63738 |
| AT4G23580   | PtVII000004  |       |       |         |             | jgi Phypa1_1 68326 |
| AT4G25710   | PtX002172    |       |       |         |             | jgi Phypa1_1 70860 |
| AT4G29370   | Pt170000007  |       |       |         |             | jgi Phypa1_1 90500 |
| AT4G33900   | PtVIII000539 |       |       |         |             | jgi Phypa1_1 91322 |
| AT4G34170   | Pt129000020  |       |       |         |             | jgi Phypa1_1 96028 |
| AT4G35120   |              |       |       |         |             | jgi Phypa1_1 96502 |
| AT4G38940   |              |       |       |         |             | jgi Phypa1_1 97006 |
| AT4G39240   |              |       |       |         |             | jgi Phypa1_1 98858 |
| AT4G39290   |              |       |       |         |             |                    |
| AT4G39550   |              |       |       |         |             |                    |
| AT4G39560   |              |       |       |         |             |                    |
| AT4G39570   |              |       |       |         |             |                    |
| AT4G39580   |              |       |       |         |             |                    |
| AT4G39590   |              |       |       |         |             |                    |
| AT4G39600   |              |       |       |         |             |                    |
| AT4G39753   |              |       |       |         |             |                    |
| AT4G39756   |              |       |       |         |             |                    |
| AT4G39760   |              |       |       |         |             |                    |
| AT5G02980   |              |       |       |         |             |                    |
| AT5G02990   |              |       |       |         |             |                    |
| AT5G03000   |              |       |       |         |             |                    |
| AT5G03020   |              |       |       |         |             |                    |
| AT5G07610   |              |       |       |         |             |                    |
| AT5G15710   |              |       |       |         |             |                    |
| AT5G26960   |              |       |       |         |             |                    |
| AT5G28160   |              |       |       |         |             |                    |
| AT5G28180   |              |       |       |         |             |                    |
| AT5G38670   |              |       |       |         |             |                    |
| AT5G38680   |              |       |       |         |             |                    |
| AT5G39560   |              |       |       |         |             |                    |
| AT5G40680   |              |       |       |         |             |                    |

---

---

| Arabidopsis | Populus | Vitis | Oryza | Sorghum | Selaginella | Physcomitrella |
|-------------|---------|-------|-------|---------|-------------|----------------|
| AT5G42350   |         |       |       |         |             |                |
| AT5G42360   |         |       |       |         |             |                |
| AT5G43190   |         |       |       |         |             |                |
| AT5G48980   |         |       |       |         |             |                |
| AT5G48990   |         |       |       |         |             |                |
| AT5G49000   |         |       |       |         |             |                |
| AT5G51250   |         |       |       |         |             |                |
| AT5G57360   |         |       |       |         |             |                |
| AT5G60570   |         |       |       |         |             |                |

---

---

**Supplemental Table S2.** Number of F-box kelch proteins in non-plant model species

---

| Species                          | Number of FBKs | Number of kelch repeats (Pfam) | Protein ID            |
|----------------------------------|----------------|--------------------------------|-----------------------|
| Bacteria                         | -              | -                              | -                     |
| <i>Saccharomyces cerevisiae</i>  | -              | -                              | -                     |
| <i>Chlamydomonas reinhardtii</i> | 1              | 3                              | EDP09183 <sup>a</sup> |
| <i>Caenorhabditis elegans</i>    | 1              | 3                              | Q9N3K6 <sup>b</sup>   |
| <i>Drosophila melanogaster</i>   | 1              | 3                              | Q9W281 <sup>b</sup>   |
| <i>Mus Musculus</i>              | 1              | 3                              | Q6PDJ6 <sup>b</sup>   |
| <i>Homo sapiens</i>              | 1              | 3                              | Q6P3S6 <sup>b</sup>   |

<sup>a</sup>GenBank ID; <sup>b</sup>Swiss Prot ID

---

**Supplemental Table S3:** Identifiers of F-box proteins with F-box associated domains in *A. thaliana*, *P. trichocarpa*, *V. vinifera*, *O. sativa*, *S. bicolor*, *S. moellendorffii* and *P. patens*.

| Arabidopsis | Populus    | Vitis        | Oryza      | Sorghum      | Selaginella | Physcomitrella       |
|-------------|------------|--------------|------------|--------------|-------------|----------------------|
| AT1G09650   | Pop 241644 | GSV02287001* | Os02g10600 | Sb01g003460  | Selm 428410 | jgi Phypa1_1 163116  |
| AT1G10890   | Pop 246916 | GSV26022001  | Os02g33840 | Sb01g013220* | Selm 413145 | jgi Phypa1_1 164205* |
| AT1G11620   | Pop 547750 | GSV26967001* | Os02g35560 | Sb01g013240* | Selm 33948* | jgi Phypa1_1 234287  |
| AT1G11810   | Pop 548688 | GSV33571001  | Os03g25640 | Sb01g018980  |             | jgi Phypa1_1 234728  |
| AT1G12170   | Pop 548689 | GSV33582001  | Os03g46690 | Sb01g031390  |             | jgi Phypa1_1 65071   |
| AT1G12190   | Pop 549801 |              | Os04g11450 | Sb01g034970  |             | jgi Phypa1_1 90500*  |
| AT1G12870   | Pop 560159 |              | Os04g11660 | Sb01g037880  |             | jgi Phypa1_1 91913   |
| AT1G13200   | Pop 563457 |              | Os04g11790 | Sb02g001040  |             |                      |
| AT1G24793   | Pop 565298 |              | Os04g50200 | Sb02g002025* |             |                      |
| AT1G24880   | Pop 568920 |              | Os05g02570 | Sb02g005870  |             |                      |
| AT1G25141   | Pop 569113 |              | Os05g08010 | Sb02g005880* |             |                      |
| AT1G30780   | Pop 569545 |              | Os05g08350 | Sb02g005890  |             |                      |
| AT1G30790   | Pop 569549 |              | Os05g08440 | Sb02g008113  |             |                      |
| AT1G30920   | Pop 570279 |              | Os05g08460 | Sb02g023440  |             |                      |
| AT1G30925   | Pop 571268 |              | Os06g07380 | Sb02g027685  |             |                      |
| AT1G30930   | Pop 571296 |              | Os06g07390 | Sb03g044080  |             |                      |
| AT1G30935   | Pop 574752 |              | Os06g07460 | Sb04g000800  |             |                      |
| AT1G31000   | Pop 575938 |              | Os07g08570 | Sb04g003010  |             |                      |
| AT1G31080   | Pop 579428 |              | Os07g09710 | Sb04g006790  |             |                      |
| AT1G31090   | Pop 581757 |              | Os07g09814 | Sb04g009700* |             |                      |
| AT1G32140   | Pop 581764 |              | Os07g09870 | Sb04g025085  |             |                      |
| AT1G32420   | Pop 585979 |              | Os07g13870 | Sb04g026045  |             |                      |
| AT1G32430   | Pop 587549 |              | Os07g13890 | Sb05g020470  |             |                      |
| AT1G32660   | Pop 590131 |              | Os07g16420 | Sb05g025730  |             |                      |
| AT1G33010   | Pop 590133 |              | Os07g16800 | Sb05g025750  |             |                      |
| AT1G33020   | Pop 590935 |              | Os07g35050 | Sb06g027040  |             |                      |
| AT1G33530   | Pop 592321 |              | Os07g35060 | Sb08g003880  |             |                      |
| AT1G46840   | Pop 597059 |              | Os08g10340 | Sb08g015610  |             |                      |
| AT1G46984   | Pop 666139 |              | Os08g36960 | Sb08g021860  |             |                      |
| AT1G47340   | Pop 241644 |              | Os09g20650 | Sb08g021900  |             |                      |

| Arabidopsis | Populus     | Vitis | Oryza        | Sorghum     | Selaginella | Physcomitrella |
|-------------|-------------|-------|--------------|-------------|-------------|----------------|
| AT1G47390   | Pop 752836  |       | Os09g27570   | Sb09g027720 |             |                |
| AT1G47730   | Pop 753649  |       | Os09g30180   | Sb09g030410 |             |                |
| AT1G47765   | Pop 754910* |       | Os09g34200   | Sb10g010900 |             |                |
| AT1G47790   | Pop 756767* |       | Os10g04850   | Sb10g024600 |             |                |
| AT1G47800   | Pop 761635  |       | Os10g25210*  |             |             |                |
| AT1G47810   | Pop 761790  |       | Os10g25660   |             |             |                |
| AT1G48060   | Pop 763809  |       | Os12g03440   |             |             |                |
| AT1G50870   | Pop 764347  |       | Os12g06740   |             |             |                |
| AT1G50880   | Pop 764712  |       | Os06g0170866 |             |             |                |
| AT1G51290   | Pop 765277  |       |              |             |             |                |
| AT1G51320   | Pop 766270  |       |              |             |             |                |
| AT1G52490   | Pop 770387  |       |              |             |             |                |
| AT1G53370   | Pop 771222* |       |              |             |             |                |
| AT1G53550   | Pop 775680  |       |              |             |             |                |
| AT1G53790   | Pop 783326  |       |              |             |             |                |
| AT1G54550   | Pop 786330  |       |              |             |             |                |
| AT1G55070   | Pop 787092  |       |              |             |             |                |
| AT1G58090   | Pop 799299  |       |              |             |             |                |
| AT1G59680   | Pop 801694  |       |              |             |             |                |
| AT1G60370   | Pop 805278  |       |              |             |             |                |
| AT1G61060   | Pop 807217* |       |              |             |             |                |
| AT1G62270   | Pop 808297  |       |              |             |             |                |
| AT1G65990   |             |       |              |             |             |                |
| AT1G66490   |             |       |              |             |             |                |
| AT1G67130   |             |       |              |             |             |                |
| AT1G67450   |             |       |              |             |             |                |
| AT1G67455   |             |       |              |             |             |                |
| AT1G70380   |             |       |              |             |             |                |
| AT1G70390   |             |       |              |             |             |                |
| AT1G70960   |             |       |              |             |             |                |

---

| Arabidopsis | Populus | Vitis | Oryza | Sorghum | Selaginella | Physcomitrella |
|-------------|---------|-------|-------|---------|-------------|----------------|
| AT1G70970   |         |       |       |         |             |                |
| AT1G71320   |         |       |       |         |             |                |
| AT1G76830   |         |       |       |         |             |                |
| AT1G77650   |         |       |       |         |             |                |
| AT2G02890   |         |       |       |         |             |                |
| AT2G04920   |         |       |       |         |             |                |
| AT2G07140   |         |       |       |         |             |                |
| AT2G13130   |         |       |       |         |             |                |
| AT2G14710   |         |       |       |         |             |                |
| AT2G15640   |         |       |       |         |             |                |
| AT2G16220   |         |       |       |         |             |                |
| AT2G16450   |         |       |       |         |             |                |
| AT2G16810   |         |       |       |         |             |                |
| AT2G17310   |         |       |       |         |             |                |
| AT2G17830   |         |       |       |         |             |                |
| AT2G18780   |         |       |       |         |             |                |
| AT2G19630   |         |       |       |         |             |                |
| AT2G21930   |         |       |       |         |             |                |
| AT2G23160   |         |       |       |         |             |                |
| AT2G27520   |         |       |       |         |             |                |
| AT2G31470   |         |       |       |         |             |                |
| AT2G33655   |         |       |       |         |             |                |
| AT2G34280   |         |       |       |         |             |                |
| AT2G38590   |         |       |       |         |             |                |
| AT2G40910   |         |       |       |         |             |                |
| AT2G40920   |         |       |       |         |             |                |
| AT2G40925   |         |       |       |         |             |                |
| AT2G43260   |         |       |       |         |             |                |
| AT2G43440   |         |       |       |         |             |                |
| AT3G04660   |         |       |       |         |             |                |

---

---

| Arabidopsis | Populus | Vitis | Oryza | Sorghum | Selaginella | Physcomitrella |
|-------------|---------|-------|-------|---------|-------------|----------------|
| AT3G06240   |         |       |       |         |             |                |
| AT3G07870   |         |       |       |         |             |                |
| AT3G08750   |         |       |       |         |             |                |
| AT3G10240   |         |       |       |         |             |                |
| AT3G10430   |         |       |       |         |             |                |
| AT3G10790   |         |       |       |         |             |                |
| AT3G13680   |         |       |       |         |             |                |
| AT3G13820   |         |       |       |         |             |                |
| AT3G13830   |         |       |       |         |             |                |
| AT3G16210   |         |       |       |         |             |                |
| AT3G16555   |         |       |       |         |             |                |
| AT3G16580   |         |       |       |         |             |                |
| AT3G16590   |         |       |       |         |             |                |
| AT3G16740   |         |       |       |         |             |                |
| AT3G16820   |         |       |       |         |             |                |
| AT3G16880   |         |       |       |         |             |                |
| AT3G17265   |         |       |       |         |             |                |
| AT3G17280   |         |       |       |         |             |                |
| AT3G17320   |         |       |       |         |             |                |
| AT3G17480   |         |       |       |         |             |                |
| AT3G17490   |         |       |       |         |             |                |
| AT3G17500   |         |       |       |         |             |                |
| AT3G17530   |         |       |       |         |             |                |
| AT3G17540   |         |       |       |         |             |                |
| AT3G17560   |         |       |       |         |             |                |
| AT3G17570   |         |       |       |         |             |                |
| AT3G17620   |         |       |       |         |             |                |
| AT3G17710   |         |       |       |         |             |                |
| AT3G18320   |         |       |       |         |             |                |
| AT3G18330   |         |       |       |         |             |                |

---



---

| Arabidopsis | Populus | Vitis | Oryza | Sorghum | Selaginella | Physcomitrella |
|-------------|---------|-------|-------|---------|-------------|----------------|
| AT3G18340   |         |       |       |         |             |                |
| AT3G18910   |         |       |       |         |             |                |
| AT3G18980   |         |       |       |         |             |                |
| AT3G19410   |         |       |       |         |             |                |
| AT3G19470   |         |       |       |         |             |                |
| AT3G19560   |         |       |       |         |             |                |
| AT3G19880   |         |       |       |         |             |                |
| AT3G19890   |         |       |       |         |             |                |
| AT3G20030   |         |       |       |         |             |                |
| AT3G20690   |         |       |       |         |             |                |
| AT3G20710   |         |       |       |         |             |                |
| AT3G21120   |         |       |       |         |             |                |
| AT3G21130   |         |       |       |         |             |                |
| AT3G21170   |         |       |       |         |             |                |
| AT3G21410   |         |       |       |         |             |                |
| AT3G22350   |         |       |       |         |             |                |
| AT3G22421   |         |       |       |         |             |                |
| AT3G22650   |         |       |       |         |             |                |
| AT3G22700   |         |       |       |         |             |                |
| AT3G22710   |         |       |       |         |             |                |
| AT3G22720   |         |       |       |         |             |                |
| AT3G22730   |         |       |       |         |             |                |
| AT3G22870   |         |       |       |         |             |                |
| AT3G22940   |         |       |       |         |             |                |
| AT3G23260   |         |       |       |         |             |                |
| AT3G23420   |         |       |       |         |             |                |
| AT3G23880   |         |       |       |         |             |                |
| AT3G23960   |         |       |       |         |             |                |
| AT3G24580   |         |       |       |         |             |                |
| AT3G25460   |         |       |       |         |             |                |

---

---

| Arabidopsis | Populus | Vitis | Oryza | Sorghum | Selaginella | Physcomitrella |
|-------------|---------|-------|-------|---------|-------------|----------------|
| AT3G44120   |         |       |       |         |             |                |
| AT3G44130   |         |       |       |         |             |                |
| AT3G47020   |         |       |       |         |             |                |
| AT3G47030   |         |       |       |         |             |                |
| AT3G47150   |         |       |       |         |             |                |
| AT3G49450   |         |       |       |         |             |                |
| AT3G49510   |         |       |       |         |             |                |
| AT3G49520   |         |       |       |         |             |                |
| AT3G49980   |         |       |       |         |             |                |
| AT3G52320   |         |       |       |         |             |                |
| AT3G57580   |         |       |       |         |             |                |
| AT3G57590   |         |       |       |         |             |                |
| AT3G59610   |         |       |       |         |             |                |
| AT3G61340   |         |       |       |         |             |                |
| AT4G04690   |         |       |       |         |             |                |
| AT4G05080   |         |       |       |         |             |                |
| AT4G09190   |         |       |       |         |             |                |
| AT4G09790   |         |       |       |         |             |                |
| AT4G09870   |         |       |       |         |             |                |
| AT4G10740   |         |       |       |         |             |                |
| AT4G11590   |         |       |       |         |             |                |
| AT4G12560   |         |       |       |         |             |                |
| AT4G17200   |         |       |       |         |             |                |
| AT4G17780   |         |       |       |         |             |                |
| AT4G19930   |         |       |       |         |             |                |
| AT4G19940   |         |       |       |         |             |                |
| AT4G21240   |         |       |       |         |             |                |
| AT4G29970   |         |       |       |         |             |                |
| AT4G33160   |         |       |       |         |             |                |
| AT4G33290   |         |       |       |         |             |                |

---

---

| Arabidopsis             | Populus | Vitis | Oryza | Sorghum | Selaginella | Physcomitrella |
|-------------------------|---------|-------|-------|---------|-------------|----------------|
| AT4G38870               |         |       |       |         |             |                |
| AT5G07610*              |         |       |       |         |             |                |
| AT5G10340               |         |       |       |         |             |                |
| AT5G15660               |         |       |       |         |             |                |
| AT5G15670               |         |       |       |         |             |                |
| AT5G18160               |         |       |       |         |             |                |
| AT5G36200               |         |       |       |         |             |                |
| AT5G36730/<br>AT5G36820 |         |       |       |         |             |                |
| AT5G37040               |         |       |       |         |             |                |
| AT5G38810               |         |       |       |         |             |                |
| AT5G41490               |         |       |       |         |             |                |
| AT5G41500               |         |       |       |         |             |                |
| AT5G41510               |         |       |       |         |             |                |
| AT5G42430               |         |       |       |         |             |                |
| AT5G42460               |         |       |       |         |             |                |
| AT5G47300               |         |       |       |         |             |                |
| AT5G50220               |         |       |       |         |             |                |
| AT5G51000               |         |       |       |         |             |                |
| AT5G52610               |         |       |       |         |             |                |
| AT5G52620               |         |       |       |         |             |                |
| AT5G60560               |         |       |       |         |             |                |
| AT5G62060               |         |       |       |         |             |                |
| AT5G62510               |         |       |       |         |             |                |
| AT5G62660               |         |       |       |         |             |                |
| AT5G65850               |         |       |       |         |             |                |

---

\* F-box proteins with F-box associated domain and kelch repeats.

---

**Supplemental Table S4:** Comparison of three tree topologies obtained with three different algorithms (NJ=Neighbor-Joining, Bayesian and ML=Maximum Likelihood) using Shimodaira-Hasegawa (Shimodaira and Hasegawa, 1999) and one-sided Kishino-Hasegawa (1sKH, Kishino and Hasegawa, 1989) tests, implemented in Treepuzzle (Schmidt and von Haeseler, 2007). In addition, a Chi-square test was performed to compare the likelihoods (l) of the three trees to the best tree (in this case the ML tree). The ML and NJ trees have the same likelihood.

| Tree     | l         | $\Delta l$ | S.E.      | p1-skh | p-SH  | 2 $\Delta l$ | Chi-square | p-value |
|----------|-----------|------------|-----------|--------|-------|--------------|------------|---------|
| NJ       | -30957.15 | 0          | 0.0024    | 1      | 0.737 | 0            | 0          | 0       |
| Bayesian | -31069.27 | 112.12     | 22.7059   | 0      | 0     | 224.24       | 0.406      | 0.03    |
| ML       | -30957.15 | 0          | best tree | 1      | 1     | 0            | 0          | 0       |

**Schmidt HA, von Haeseler A (2007)** Maximum-likelihood analysis using TREE-PUZZLE. Curr Prot Bioinformatics **Chapter 6:** Unit 6.6

**Supplemental Table S5.** Number of unstable, stable, ancient and superstable FBKs in *A. thaliana*, *V. vinifera*, *P. trichocarpa*, *O. sativa*, *S. bicolor*, *S.moellendorffii* and *P. patens*.

| Species                           | Number of unstable FBKs | Number of stable FBKs | Number of ancient FBKs | Number of superstable FBKs | Total number of FBKs |
|-----------------------------------|-------------------------|-----------------------|------------------------|----------------------------|----------------------|
| <i>Arabidopsis thaliana</i>       | 66                      | 14                    | 12                     | 11                         | 103                  |
| <i>Vitis vinifera</i>             | 0                       | 15                    | 9                      | 12                         | 36                   |
| <i>Populus trichocarpa</i>        | 0                       | 21                    | 30                     | 17                         | 68                   |
| <i>Oryza sativa</i>               | 0                       | 11                    | 15                     | 13                         | 39                   |
| <i>Sorghum bicolor</i>            | 0                       | 18                    | 16                     | 10                         | 44                   |
| <i>Selaginella moellendorffii</i> | 5                       | 16                    | 11                     | 14                         | 46                   |
| <i>Physcomitrella patens</i>      | 19                      | 20                    | 5                      | 27                         | 71                   |

**Supplemental Table S6.** Sequences of q-RT PCR primers

| Primer      | Sequence                      |
|-------------|-------------------------------|
| AT1G14330_F | 5' ACTGAGATACCGGAAATGTGCGC 3' |
| AT1G14330_R | 5' TCAGCATGATCAGCAGCATACA 3'  |
| AT1G26930_F | 5' AGAGATTGCGGTTTTAGCGG 3'    |
| AT1G26930_R | 5' CATCCATAAACACACCGGAACA 3'  |
| AT1G74510_F | 5' AGCTTTATGCTGCGAATTACGC 3'  |
| AT1G74510_R | 5' CACTAACTGATCCCCACAAGCC 3'  |
| AT2G02870_F | 5' TGATCACGCCGATATGGAAGT 3'   |
| AT2G02870_R | 5' AGCAAGTCCCATCCGTTTAC 3'    |
| AT3G27150_F | 5' CGTGTTGGACGATGTTTGACA 3'   |
| AT3G27150_R | 5' CGCAAAGCGATTCTTTATCTCC 3'  |
| AT5G40680_F | 5' CGTATTGTGGTGTGGCGATA 3'    |
| AT5G40680_R | 5' CTTGATTCCTCCAGCGAAAA 3'    |
| AT5G60570_F | 5' ATGGTGGACTCGTCAAACGGT 3'   |
| AT5G60570_R | 5' CAAGAATTCACCACAATGCCCT 3'  |
